# Supplementary material
Source: PubMed Central journal article supplement (PMC7469880)
Supplement: NIHMS1618374-supplement-Supplemental_table_2.pdf [file NIHMS1618374-supplement-Supplemental_table_2.pdf]

| Supplementary Table 2. Primers, siRNAs, FUSE anti-sense oligonucleotids and PCR conditions used in this study. |                                 |                                                                         |                                                                           |
|----------------------------------------------------------------------------------------------------------------|---------------------------------|-------------------------------------------------------------------------|---------------------------------------------------------------------------|
| Targets                                                                                                        | RT-PCR primers                  | Sequences                                                               | PCR conditions                                                            |
| <b>FIR-N-term mRNA</b>                                                                                         | FIR-Forward (N-term)            | 5'-AGACAGCGGAAGGAGCAAGAGTGG-3'                                          | 95°C;10min, (95°C; 30sec, 56°C; 30sec, 72°C; 30sec)x35cycles, 72°C; 10min |
|                                                                                                                | FIR-Reverse (N-term)            | 5'-CTGTGCAGCTTCGGGGACCTCATA -3'                                         |                                                                           |
| <b>βactin mRNA</b>                                                                                             | βactin-Forward                  | 5'-TGGAGAAAATCTGGCACCAC-3'                                              | 95°C;10min, (95°C; 30sec, 56°C; 30sec, 72°C; 30sec)x35cycles, 72°C; 10min |
|                                                                                                                | βactin-Reverse                  | 5'-AATGGTGATGACCTGGCCGT-3'                                              |                                                                           |
|                                                                                                                | <b>qRT-PCR primers</b>          | <b>Sequences</b>                                                        |                                                                           |
| <b>c-myc mRNA</b>                                                                                              | <i>c-myc</i> -Forward           | 5'-GCCTCAGAGTGCATCGAC-3'                                                | 95°C;10min, (95°C; 10sec, 62°C; 10sec, 72°C; 7sec)x40cycles, 40°C; 30sec  |
|                                                                                                                | <i>c-myc</i> -Reverse           | 5'-TCCACAGAAACAACATCG -3'                                               |                                                                           |
| <b>FIR mRNA</b>                                                                                                | FIR-Forward (exons 2)           | 5'-CCATAGCTCTCCAGGTCA-3'                                                | 95°C;10min, (95°C; 10sec, 60°C; 15sec, 72°C; 14sec)x40cycles, 40°C; 30sec |
| <b>FIRΔexon2 mRNA</b>                                                                                          | FIR-Forward (exons 1-3)         | 5'-CGACCATAGCTCTCGGCA-3'                                                | 95°C;10min, (95°C; 10sec, 60°C; 20sec, 72°C; 13sec)x45cycles, 40°C; 30sec |
|                                                                                                                | FIR-Reverse                     | 5'-CGTAGACGCGGCACATGA-3'(exon6)                                         |                                                                           |
|                                                                                                                | FIR-Frobe at exons4-6           | 5'-GCAGCTACCAACCTGCAGATGGC-3' with fluorescein                          |                                                                           |
|                                                                                                                | FIR-Frobe at exon6              | 5'-GCTCAGCGGCAGCGGGCGCT-3' with LCRed                                   |                                                                           |
| <b>FIR Δ3 mRNA</b>                                                                                             | FIR Δ3-Forward (exons3-6)       | 5'-GAGGCCCTTCAGAAAGATG-3'                                               | 95°C;10min, (95°C; 10sec, 63°C; 15sec, 72°C; 8sec)x40cycles, 40°C; 30sec  |
| <b>FIR Δ4 mRNA</b>                                                                                             | FIR Δ4 -Forward (exons1-6)      | 5'-GGCGACCATAGCTCTCAT-3'                                                | 95°C;10min, (95°C; 10sec, 65°C; 15sec, 72°C; 8sec)x40cycles, 40°C; 30sec  |
|                                                                                                                | FIR Δ3 Δ4-Reverse(exon7)        | 5'-TTCGGGGACCTCACTC-3'                                                  |                                                                           |
|                                                                                                                | FIR Δ3 Δ4-Probe at exon6        | 5'-CCCCCTTTGGCCCCATCAAGAGCATC-3' with fluorescein                       |                                                                           |
|                                                                                                                | FIR Δ3 Δ4-Probe at exon6        | 5'-ACATGTCTCTGGGACTCCGTCACCATGAAG-3' with LCRed                         |                                                                           |
| <b>SAP155 mRNA</b>                                                                                             | SAP155-Forward                  | 5'-TTATGGTGGAAGTGACAGA-3'                                               | 95°C;10min, (95°C; 10sec, 60°C; 25sec)x45cycles, 40°C; 30sec              |
|                                                                                                                | SAP155-Reverse                  | 5'-TCTGACCAAGCAAACCTCGTA-3'                                             |                                                                           |
|                                                                                                                | SAP155-TaqMan Probe             | 5'-CAACTGAACTTGAAGATGATGACGATGACT-3'                                    |                                                                           |
| <b>SAP130 mRNA</b>                                                                                             | SAP130-Forward                  | 5'-CCCAGCAGACACTTACTTTC-3'                                              | 95°C;10min, (95°C; 10sec, 60°C; 25sec)x45cycles, 40°C; 30sec              |
|                                                                                                                | SAP130-Forward                  | 5'-TCCACTTGGACCATCTGAC-3'                                               |                                                                           |
|                                                                                                                | SAP130-TaqMan Probe             | 5'-TTGCCGTGTTCTCCAAAGGTTCACT-3'                                         |                                                                           |
|                                                                                                                | <b>siRNA</b>                    | <b>Sequences</b>                                                        |                                                                           |
| <b>FIR protein</b>                                                                                             | FIR siRNA                       | 5'-rCrArGUrGrAUrGrGUUUCUrGrCrGrArATT (sense)                            |                                                                           |
|                                                                                                                |                                 | 5'-UUrGrCrGrCrArGrArArArCrArUArCrArCUrGTT (anti-sense)                  |                                                                           |
| <b>SAP155 protein</b>                                                                                          | SAP155 siRNA                    | 5'-rCrGrArGUUUrGrCUUrGrGUrCrArGrArATT (sense)                           |                                                                           |
|                                                                                                                |                                 | 5'-UUrCUrGrArCrArArGrCrArArArCUrGTT (anti-sense)                        |                                                                           |
|                                                                                                                | <b>Transcribed c-myc intron</b> | <b>Sequences</b>                                                        |                                                                           |
| <b>c-myc intron 1</b>                                                                                          | c-myc-F (exon1)                 | 5'-CAGGACCCGCTTCTCTGAAA                                                 | 95°C;10min, (95°C; 30sec, 58°C; 30sec, 72°C; 30sec)x35cycles, 72°C; 10min |
|                                                                                                                | c-myc-R1 (exon1)                | 5'-ggcattcgactcatctcagc                                                 |                                                                           |
|                                                                                                                | c-myc-R2 (intron1)              | 5'-ccccgactcagttcttgatt                                                 |                                                                           |
|                                                                                                                | c-myc-R3 (intron1)              | 5'-ggtccctactcagaggact                                                  |                                                                           |
|                                                                                                                | c-myc-R4 (intron1)              | 5'-cgtctccgctgctcagaaat                                                 |                                                                           |
|                                                                                                                | c-myc-R5 (intron1)              | 5'-cggagattcgcctggtttt                                                  |                                                                           |
|                                                                                                                | c-myc-R6 (intron1)              | 5'-cccgtccaaactccttttg                                                  |                                                                           |
| <b>FIR/FIRΔexon2-Myc-tag</b>                                                                                   | <b>PCR primers</b>              | <b>Sequences</b>                                                        |                                                                           |
|                                                                                                                | FIR-BgIII-F                     | 5'-tcggcagatcttttgagg                                                   | 95°C;2min, (95°C; 30sec, 50°C; 30sec, 72°C; 90sec)x30cycles, 72°C; 10min  |
|                                                                                                                | FIR-Myc-Xbal-R                  | 5'-atctctagatcacaggctcctctctctctctgagatcagcttctctgattgatccatcgcagaggctc | 95°C;2min, (95°C; 30sec, 50°C; 30sec, 72°C; 90sec)x30cycles, 72°C; 10min  |
| <b>EMSA</b>                                                                                                    | <b>FUSE ss-oligonucleotides</b> | 5'-ATAATGTATATTCCTCGGGATTTTTATTTTGTGTTATT                               |                                                                           |
